# Supplementary material
Source: publisher figshare collection journal article supplement (https://sage.figshare.com/ndownloader/files/17282525)
Supplement: Supplementary file 1 [file 17282525]

#### Appendix 4: Presence of radiolucent lines in humeral zones at 48 months

| Presence of Radiolucent Lines |             |          |
|-------------------------------|-------------|----------|
| Zone                          | None        | >1.0mm   |
| 1                             | 177 (98.3%) | 3 (1.7%) |
| 2                             | 176 (97.8%) | 4 (2.2%) |
| 3                             | 175 (97.2%) | 5 (2.8%) |
| 4                             | 176 (97.8%) | 4 (2.2%) |
| 5                             | 172 (95.6%) | 8 (4.4%) |
